# Supplementary material for: Activity of Cefiderocol Against Enterobacterales, Pseudomonas aeruginosa, and Acinetobacter baumannii Endemic to Medical Centers in New York City
Source: PubMed Central journal article supplement (PMC7368386; doi:10.1089/mdr.2019.0298), 2020-07-07
Supplement: Supp_TableS1.pdf [file Supp_TableS1.pdf]

## Supplementary Data

SUPPLEMENTARY TABLE S1. CEFIDEROCOL MICs AND DATA ASSOCIATED WITH ANTIMICROBIAL RESISTANCE  
IN 34 CHARACTERIZED ISOLATES OF *KLEBSIELLA PNEUMONIAE*

| <i>Isolate</i> | <i>Cefiderocol</i> | <i>KPC</i> | <i>ESBL</i> | <i>bla<sub>KPC</sub></i> | <i>acrB</i>                | <i>ompK35</i> | <i>ompK36</i> |
|----------------|--------------------|------------|-------------|--------------------------|----------------------------|---------------|---------------|
|                | <i>MIC (mg/L)</i>  |            |             |                          | <i>Relative expression</i> |               |               |
| 1              | 0.5                | No         | SHV         |                          | 0.11                       | 1.11          | 1.81          |
| 2              | 4                  |            | SHV         |                          | 0.45                       | 0.5           | 3.85          |
| 3              | 1                  | No         | SHV         |                          | 0.45                       | 0.54          | 4.58          |
| 4              | 1                  | No         | SHV         |                          | 0.34                       | 0.43          | 1.97          |
| 5              | 2                  | No         | SHV         |                          | 0.02                       | 0.13          | 1.01          |
| 6              | 1                  | No         | SHV         |                          | 0                          | 0.18          | 0.88          |
| 7              | 0.25               | Yes        | SHV         | 1                        | 0.49                       | 0.06          | 0.25          |
| 8              | 0.25               | Yes        | SHV         | 1.1                      | 0.52                       | 1.58          | 5.7           |
| 9              | 4                  | Yes        | SHV         | 2.5                      | 0.04                       | 0.08          | 0.004         |
| 10             | 0.25               | No         | SHV         |                          | 1.24                       | 0.28          | 1.36          |
| 11             | 2                  | Yes        | SHV         | 15                       | 0.17                       | 0.11          | 0.18          |
| 12             | 0.12               | Yes        | SHV         | 5                        | 0.74                       | 0.37          | 7.59          |
| 13             | 0.25               | No         | SHV         |                          | 0.5                        | 1.25          | 3.11          |
| 14             | 0.5                | No         | SHV         |                          | 1.07                       | 2.5           | 8.22          |
| 15             | 0.5                | Yes        | SHV         | 18.75                    | 1.64                       | 0.94          | 7.71          |
| 16             | 0.5                | Yes        | SHV         | 5                        | 1.21                       | 1.8           | 4.47          |
| 17             | 0.06               | Yes        | SHV         | 1.25                     | 0.32                       | 0.54          | 2.94          |
| 18             | 2                  | Yes        | SHV         | 198.75                   | 6.01                       | 1.44          | 4.51          |
| 19             | 0.5                | No         | SHV         |                          | 0.21                       | 0.23          | 1.32          |
| 20             | 0.5                | No         |             |                          | 0.07                       | 1.88          | 0.86          |
| 21             | 0.12               | No         |             |                          | 0.41                       | 1.45          | 3.03          |
| 22             | 0.25               | No         |             |                          | 0.38                       | 0.02          | 1.41          |
| 23             | 1                  | Yes        | SHV         | 40                       | 1.6                        | 1.15          | 8.19          |
| 24             | 0.12               | No         |             |                          | 0.21                       | 2.84          | 6.12          |
| 25             | 0.25               | No         |             |                          | 0.24                       | 0.51          | 1.04          |
| 26             | 0.06               |            |             |                          | 2.85                       | 1.51          | 5.41          |
| 27             | 0.03               |            |             |                          | 1.5                        | 4.39          | 5.18          |
| 28             | 0.5                |            |             |                          | 2.65                       | 1.43          | 5.1           |
| 29             | 0.5                | No         |             |                          | 1.71                       | 1.27          | 1.92          |
| 30             | 0.06               | No         |             |                          | 0.02                       | 0.24          | 1.31          |
| 31             | 1                  | Yes        |             | 1.1                      | 0.05                       | 0.49          | 1.7           |
| 32             | 0.5                | Yes        |             | 3.75                     | 0.41                       | 0.17          | 0.06          |
| 33             | 1                  | Yes        |             | 22.5                     | 0.56                       | 0.16          | 3.28          |
| 34             | 1                  | Yes        |             | 1                        | 0.2                        | 2.74          | 4.19          |
