# Supplementary material for: Activity of Cefiderocol Against Enterobacterales, Pseudomonas aeruginosa, and Acinetobacter baumannii Endemic to Medical Centers in New York City
Source: PubMed Central journal article supplement (PMC7368386; doi:10.1089/mdr.2019.0298), 2020-07-07
Supplement: Supp_TableS2.pdf [file Supp_TableS2.pdf]

SUPPLEMENTARY TABLE S2. CEFIDEROCOL MICs AND EXPRESSION OF GENES ASSOCIATED WITH ANTIMICROBIAL RESISTANCE FOR 33 ISOLATES OF *PSEUDOMONAS AERUGINOSA*

| <i>Isolate</i> | <i>Cefiderocol</i> | <i>bla<sub>ampC</sub></i>  | <i>oprD</i> | <i>mexA</i> | <i>mexC</i> | <i>mexE</i> | <i>mexX</i> |
|----------------|--------------------|----------------------------|-------------|-------------|-------------|-------------|-------------|
|                | <i>MIC (mg/L)</i>  | <i>Relative expression</i> |             |             |             |             |             |
| 1              | 0.5                | 3.52                       | 0           | 2.59        | 1.37        | 0.663       | 1.11        |
| 2              | 0.5                | 3.75                       | 0           | 1           | 1.65        | 0.667       | 1.13        |
| 3              | 0.5                | 3.65                       | 0           | 0.714       | 0.291       | 0.409       | 2.8         |
| 4              | 0.12               | 1.8                        | 0           | 1.81        | 1.83        | 0.648       | 5.69        |
| 5              | 0.12               | 2646                       | 0           | 1.93        | 0.173       | 0.05        | 29.4        |
| 6              | 0.12               | 2.4                        | 0           | 1.65        | 0.151       | 0           | 31.2        |
| 7              | 1                  | 2.08                       | 0           | 1.04        | 1.03        | 0.228       | 34.6        |
| 8              | 0.12               | 1.28                       | 0.024       | 0.961       | 0.671       | 0           | 9.62        |
| 9              | 0.06               | 483                        | 0.035       | 0.523       | 0.069       | 0.196       | 6.69        |
| 10             | 1                  | 928                        | 0.0937      | 1.37        | 4.05        | 0.758       | 29.3        |
| 11             | 0.12               | 607                        | 0.0954      | 0.411       | 0.077       | 0           | 24.3        |
| 12             | 0.12               | 269                        | 0.132       | 1.13        | 0.867       | 0.236       | 31.6        |
| 13             | 1                  | 376                        | 0.135       | 0.872       | 0.196       | 0           | 87.7        |
| 14             | 4                  | 65.5                       | 0.164       | 0.721       | 0           | 0.009       | 0.951       |
| 15             | 0.5                | 2353                       | 0.171       | 3.49        | 0.461       | 0.223       | 19.6        |
| 16             | 0.12               | 0.705                      | 0.19        | 1.53        | 8.95        | 1.09        | 12.9        |
| 17             | 0.12               | 6.16                       | 0.269       | 1.42        | 0           | 2.76        | 73.4        |
| 18             | 0.12               | 295                        | 0.276       | 5.02        | 2.46        | 0.658       | 22.9        |
| 19             | 0.12               | 2.35                       | 0.347       | 0.905       | 0.954       | 1.78        | 3.78        |
| 20             | 0.12               | 1.99                       | 0.384       | 1.02        | 0.84        | 1.45        | 17.8        |
| 21             | 0.5                | 1469                       | 0.464       | 3.12        | 2.02        | 0.6         | 42.6        |
| 22             | 0.5                | 169                        | 0.561       | 0.879       | 2.86        | 0.414       | 52.6        |
| 23             | 0.5                | 974                        | 0.705       | 2.83        | 0.171       | 0.006       | 19          |
| 24             | 0.12               | 29.2                       | 0.711       | 3.48        | 1.79        | 0.191       | 0.06        |
| 25             | 0.12               | 2.62                       | 0.813       | 0.97        | 2.69        | 0.395       | 5.03        |
| 26             | 0.5                | 7.47                       | 0.943       | 1.45        | 4.36        | 0.713       | 4.4         |
| 27             | 0.12               | 3.96                       | 1.02        | 1.75        | 9.43        | 1.69        | 4.01        |
| 28             | 0.25               | 2.67                       | 1.23        | 2.41        | 2.21        | 0           | 5.7         |
| 29             | 0.25               | 1.36                       | 1.79        | 1.67        | 0.767       | 1.22        | 6.64        |
| 30             | 0.12               | 5.06                       | 2.36        | 12.6        | 9.3         | 1.64        | 331         |
| 31             | 0.5                | 0.31                       | 4.06        | 3.94        | 3.04        | 0.427       | 5.82        |
| 32             | 0.12               | 0.412                      | 10.1        | 2.22        | 16.1        | 0.546       | 16.2        |
| 33             | 0.06               | 5.46                       | 11.1        | 2.21        | 2.13        | 0.211       | 6.87        |
