# Supplementary material for: Activity of Cefiderocol Against Enterobacterales, Pseudomonas aeruginosa, and Acinetobacter baumannii Endemic to Medical Centers in New York City
Source: PubMed Central journal article supplement (PMC7368386; doi:10.1089/mdr.2019.0298), 2020-07-07
Supplement: Supp_TableS3.pdf [file Supp_TableS3.pdf]

SUPPLEMENTARY TABLE S3. CEFIDEROCOL MICs AND DATA ASSOCIATED WITH ANTIMICROBIAL RESISTANCE IN 34 CHARACTERIZED ISOLATES OF *ACINETOBACTER BAUMANNI*

| <i>Isolate</i> | <i>Cefiderocol</i> | <i>bla<sub>ampC</sub></i>  | <i>bla<sub>oxa51</sub></i> | <i>adeB</i> | <i>abeM</i> | <i>ESBL</i> |
|----------------|--------------------|----------------------------|----------------------------|-------------|-------------|-------------|
|                | <i>MIC (mg/L)</i>  | <i>Relative expression</i> |                            |             |             |             |
| 1              | 4                  | 0                          | 6.25                       | 4.2         | 1.6         | SHV         |
| 2              | 0.25               | 0.12                       | 0.76                       | 0.08        | 1.2         |             |
| 3              | 0.06               | 0.12                       | 9.8                        | 1.2         | 1.5         |             |
| 4              | 0.12               | 0.18                       | 119                        | 1.3         | 1.6         |             |
| 5              | 2                  | 0.19                       | 61.5                       | 4.9         | 2.3         |             |
| 6              | 0.12               | 0.25                       | 36.2                       | 3.2         | 2.4         |             |
| 7              | 0.12               | 0.28                       | 29.4                       | 2           | 0.01        |             |
| 8              | 0.12               | 0.49                       | 10.2                       | 5.4         | 1.8         |             |
| 9              | 0.12               | 0.95                       | 0.3                        | 1           | 0.04        |             |
| 10             | 4                  | 4.9                        | 26.1                       | 1.4         | 1           | SHV         |
| 11             | 4                  | 5.2                        | 296                        | 0.67        | 1.1         | SHV         |
| 12             | 0.12               | 7                          | 163                        | 0           | 1           |             |
| 13             | 4                  | 9.2                        | 226                        | 28.6        | 2           | SHV         |
| 14             | 1                  | 9.2                        | 446                        | 2.3         | 3.6         |             |
| 15             | 32                 | 12.3                       | 17.5                       | 1.3         | 2.7         | SHV         |
| 16             | 4                  | 14                         | 58.6                       | 2.2         | 1.8         | SHV         |
| 17             | 2                  | 75.7                       | 30                         | 27.3        | 4.2         | SHV         |
| 18             | 1                  | 83                         | 26.6                       | 2           | 1.3         |             |
| 19             | 2                  | 114                        | 46.7                       | 6.3         | 7.2         | SHV         |
| 20             | 0.12               | 270                        | 60                         | 0.03        | 1.5         |             |
| 21             | 1                  | 401                        | 23.1                       | 14.3        | 2.1         | SHV         |
| 22             | 1                  | 10.4                       | 388                        | 4.4         | 8.5         |             |
| 23             | 0.5                | 12                         | 193                        | 1.8         | 1.7         |             |
| 24             | 2                  | 16                         | 189                        | 1.2         | 2.2         | SHV         |
| 25             | 8                  | 16.6                       | 1320                       | 2.5         | 1.6         | SHV         |
| 26             | 2                  | 17.3                       | 109                        | 28.8        | 3.2         |             |
| 27             | 0.12               | 17.6                       | 405                        | 0           | 0.78        | SHV         |
| 28             | 4                  | 18.3                       | 2514                       | 2.1         | 4.8         |             |
| 29             | 0.5                | 35                         | 160                        | 1.5         | 2.7         | SHV         |
| 30             | 1                  | 44.4                       | 2046                       | 0.64        | 2           | SHV         |
| 31             | 32                 | 53                         | 302                        | 2.6         | 3.6         | SHV         |
| 32             | 2                  | 87                         | 346                        | 3.3         | 6.2         |             |
| 33             | 32                 | 169                        | 404                        | 3.4         | 0.92        | SHV         |
| 34             | 4                  | 248                        | 1313                       | 1.1         | 1.9         | SHV         |
